# Supplementary material
Source: PubMed Central journal article supplement (PMC2785744)
Supplement: E09-07-0622_1.pdf [file E09-07-0622_1.pdf]

**Figure S1.**

Representative images of mitochondrial morphologies observed in *fzo1Δ* cells expressing the mutant V196M Fzo1 protein and mito-GFP.

**Figure S2.**

Steady-state abundance of HA-tagged WT and mutant proteins expressed in *fzo1Δ* cells. Whole cell extracts were immunoblotted with anti-HA and anti-3PGK antibodies. The average intensity of each HA band was normalized to 3PGK signal. Bars represent the abundance of HA-Fzo1 protein in each strain relative to the WT sample. Error bars indicate the SEM from at least three blots.

Figure S1  
Amiott et al.

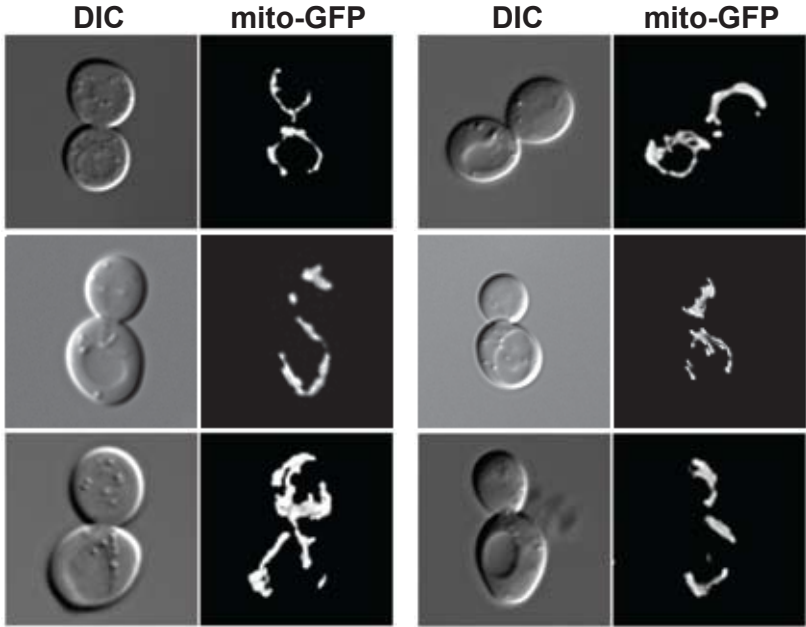

Figure S2  
Amiott et al.

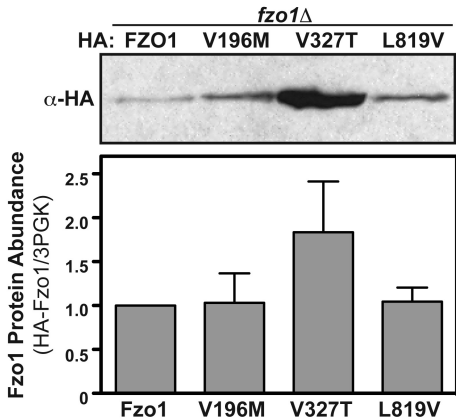

**Table S1.** List of yeast strains used in this study.

| <b>STRAIN</b>                        | <b>MAT</b>   | <b>GENOTYPE</b>                                                   | <b>PLASMID</b>                       | <b>MITO MARKER</b> |
|--------------------------------------|--------------|-------------------------------------------------------------------|--------------------------------------|--------------------|
| <b>Parent shuffle strain</b>         |              |                                                                   |                                      |                    |
| JSY7575                              | <i>alpha</i> | <i>ade2-1 leu2-3 his3-11,15 trp1-1 ura3-1 can1-100 fzo1::HIS3</i> | pRS416-FZO1                          | -                  |
| <b>fzo1Δ strains</b>                 |              |                                                                   |                                      |                    |
| JSY8006                              | <i>alpha</i> | <i>ade2-1 leu2-3 his3-11,15 trp1-1 ura3-1 can1-100 fzo1::HIS3</i> | pRS414-FZO1                          | -                  |
| JSY8645                              | <i>alpha</i> | <i>ade2-1 leu2-3 his3-11,15 trp1-1 ura3-1 can1-100 fzo1::HIS3</i> | pRS414-empty                         | -                  |
| JSY8593                              | <i>alpha</i> | <i>ade2-1 leu2-3 his3-11,15 trp1-1 ura3-1 can1-100 fzo1::HIS3</i> | pRS414- <i>fzo1</i> <sup>V196M</sup> | -                  |
| JSY8456                              | <i>alpha</i> | <i>ade2-1 leu2-3 his3-11,15 trp1-1 ura3-1 can1-100 fzo1::HIS3</i> | pRS414- <i>fzo1</i> <sup>V327T</sup> | -                  |
| JSY8961                              | <i>alpha</i> | <i>ade2-1 leu2-3 his3-11,15 trp1-1 ura3-1 can1-100 fzo1::HIS3</i> | pRS414- <i>fzo1</i> <sup>L819V</sup> | -                  |
| <b>fzo1Δ mito-GFP strains (W303)</b> |              |                                                                   |                                      |                    |
| JSY8648                              | <i>alpha</i> | <i>ade2-1 leu2-3 his3-11,15 trp1-1 ura3-1 can1-100 fzo1::HIS3</i> | pRS414-FZO1                          | pYX142-TPI-mtGFP   |
| JSY8647                              | <i>alpha</i> | <i>ade2-1 leu2-3 his3-11,15 trp1-1 ura3-1 can1-100 fzo1::HIS3</i> | pRS414-empty                         | pYX142-TPI-mtGFP   |
| JSY8649                              | <i>alpha</i> | <i>ade2-1 leu2-3 his3-11,15 trp1-1 ura3-1 can1-100 fzo1::HIS3</i> | pRS414- <i>fzo1</i> <sup>V196M</sup> | pYX142-TPI-mtGFP   |
| JSY8650                              | <i>alpha</i> | <i>ade2-1 leu2-3 his3-11,15 trp1-1 ura3-1 can1-100 fzo1::HIS3</i> | pRS414- <i>fzo1</i> <sup>V327T</sup> | pYX142-TPI-mtGFP   |
| JSY9201                              | <i>alpha</i> | <i>ade2-1 leu2-3 his3-11,15 trp1-1 ura3-1 can1-100 fzo1::HIS3</i> | pRS414- <i>fzo1</i> <sup>L819V</sup> | pYX142-TPI-mtGFP   |
| <b>fzo1Δ mito-GFP strains (FY)</b>   |              |                                                                   |                                      |                    |
| JSY8652                              | <i>a</i>     | <i>ura3-52 his3Δ200 leu2Δ1 trp1Δ63 lys2Δ202 fzo1::HIS3</i>        | pRS414-FZO1                          | pYX142-TPI-mtGFP   |
| JSY8653                              | <i>a</i>     | <i>ura3-52 his3Δ200 leu2Δ1 trp1Δ63 lys2Δ202 fzo1::HIS3</i>        | pRS414-empty                         | pYX142-TPI-mtGFP   |
| JSY8654                              | <i>a</i>     | <i>ura3-52 his3Δ200 leu2Δ1 trp1Δ63 lys2Δ202 fzo1::HIS3</i>        | pRS414- <i>fzo1</i> <sup>V196M</sup> | pYX142-TPI-mtGFP   |

|                                             |              |                                                                              |                                      |                  |
|---------------------------------------------|--------------|------------------------------------------------------------------------------|--------------------------------------|------------------|
| JSY8655                                     | <i>a</i>     | <i>ura3-52 his3Δ200 leu2Δ1 trp1Δ63 lys2Δ202 fzo1::HIS3</i>                   | pRS414- <i>fzo1</i> <sup>V327T</sup> | pYX142-TPI-mtGFP |
| <b>FZO1 strains</b>                         |              |                                                                              |                                      |                  |
| JSY3835                                     | <i>alpha</i> | <i>ade2-1 leu2-3 his3-11,15 trp1-1 ura3-1 can1-100 FZO1</i>                  | -                                    | -                |
| JSY8657                                     | <i>alpha</i> | <i>ade2-1 leu2-3 his3-11,15 trp1-1 ura3-1 can1-100 FZO1</i>                  | pRS414-FZO1                          | -                |
| JSY8658                                     | <i>alpha</i> | <i>ade2-1 leu2-3 his3-11,15 trp1-1 ura3-1 can1-100 FZO1</i>                  | pRS414-empty                         | -                |
| JSY8659                                     | <i>alpha</i> | <i>ade2-1 leu2-3 his3-11,15 trp1-1 ura3-1 can1-100 FZO1</i>                  | pRS414- <i>fzo1</i> <sup>V196M</sup> | -                |
| JSY8660                                     | <i>alpha</i> | <i>ade2-1 leu2-3 his3-11,15 trp1-1 ura3-1 can1-100 FZO1</i>                  | pRS414- <i>fzo1</i> <sup>V327T</sup> | -                |
| JSY9364                                     | <i>alpha</i> | <i>ade2-1 leu2-3 his3-11,15 trp1-1 ura3-1 can1-100 FZO1</i>                  | pRS414- <i>fzo1</i> <sup>L819V</sup> | -                |
| <b>FZO1 mito-GFP strains</b>                |              |                                                                              |                                      |                  |
| JSY8662                                     | <i>alpha</i> | <i>ade2-1 leu2-3 his3-11,15 trp1-1 ura3-1 can1-100 FZO1</i>                  | pRS414-FZO1                          | pYX142-TPI-mtGFP |
| JSY8663                                     | <i>alpha</i> | <i>ade2-1 leu2-3 his3-11,15 trp1-1 ura3-1 can1-100 FZO1</i>                  | pRS414-empty                         | pYX142-TPI-mtGFP |
| JSY8664                                     | <i>alpha</i> | <i>ade2-1 leu2-3 his3-11,15 trp1-1 ura3-1 can1-100 FZO1</i>                  | pRS414- <i>fzo1</i> <sup>V196M</sup> | pYX142-TPI-mtGFP |
| JSY8665                                     | <i>alpha</i> | <i>ade2-1 leu2-3 his3-11,15 trp1-1 ura3-1 can1-100 FZO1</i>                  | pRS414- <i>fzo1</i> <sup>V327T</sup> | pYX142-TPI-mtGFP |
| JSY9365                                     | <i>alpha</i> | <i>ade2-1 leu2-3 his3-11,15 trp1-1 ura3-1 can1-100 FZO1</i>                  | pRS414- <i>fzo1</i> <sup>L819V</sup> | pYX142-TPI-mtGFP |
| <b>Mating fusion assay mito-GFP strains</b> |              |                                                                              |                                      |                  |
| JSY7819                                     | <i>a</i>     | <i>ade2-1 leu2-3 his3-11,15 trp1-1 ura3-1 can1-100 fzo1::URA3 dnm1::HIS3</i> | -                                    | -                |
| JSY8889                                     | <i>a</i>     | <i>ade2-1 leu2-3 his3-11,15 trp1-1 ura3-1 can1-100 fzo1::URA3 dnm1::HIS3</i> | pRS414-FZO1                          | pRS415-COX4-GFP  |
| JSY8888                                     | <i>a</i>     | <i>ade2-1 leu2-3 his3-11,15 trp1-1 ura3-1 can1-100 fzo1::URA3 dnm1::HIS3</i> | pRS414-empty                         | pRS415-COX4-GFP  |
| JSY8890                                     | <i>a</i>     | <i>ade2-1 leu2-3 his3-11,15 trp1-1 ura3-1 can1-100 fzo1::URA3 dnm1::HIS3</i> | pRS414- <i>fzo1</i> <sup>V196M</sup> | pRS415-COX4-GFP  |

|                                             |              |                                                                              |                                           |                       |
|---------------------------------------------|--------------|------------------------------------------------------------------------------|-------------------------------------------|-----------------------|
| JSY8891                                     | <i>a</i>     | <i>ade2-1 leu2-3 his3-11,15 trp1-1 ura3-1 can1-100 fzo1::URA3 dnm1::HIS3</i> | pRS414- <i>fzo1</i> <sup>V327T</sup>      | pRS415-COX4-GFP       |
| JSY9474                                     | <i>a</i>     | <i>ade2-1 leu2-3 his3-11,15 trp1-1 ura3-1 can1-100 fzo1::URA3 dnm1::HIS3</i> | pRS414- <i>fzo1</i> <sup>L819V</sup>      | pRS415-COX4-GFP       |
| <b>Mating fusion assay mito-RFP strains</b> |              |                                                                              |                                           |                       |
| JSY8076                                     | <i>alpha</i> | <i>ade2-1 leu2-3 his3-11,15 trp1-1 ura3-1 can1-100 fzo1::URA3 dnm1::HIS3</i> | -                                         | -                     |
| JSY8894                                     | <i>alpha</i> | <i>ade2-1 leu2-3 his3-11,15 trp1-1 ura3-1 can1-100 fzo1::URA3 dnm1::HIS3</i> | pRS414-FZO1                               | pYX142- <i>mtRFPm</i> |
| JSY8893                                     | <i>alpha</i> | <i>ade2-1 leu2-3 his3-11,15 trp1-1 ura3-1 can1-100 fzo1::URA3 dnm1::HIS3</i> | pRS414-empty                              | pYX142- <i>mtRFPm</i> |
| JSY8895                                     | <i>alpha</i> | <i>ade2-1 leu2-3 his3-11,15 trp1-1 ura3-1 can1-100 fzo1::URA3 dnm1::HIS3</i> | pRS414- <i>fzo1</i> <sup>V196M</sup>      | pYX142- <i>mtRFPm</i> |
| JSY8896                                     | <i>alpha</i> | <i>ade2-1 leu2-3 his3-11,15 trp1-1 ura3-1 can1-100 fzo1::URA3 dnm1::HIS3</i> | pRS414- <i>fzo1</i> <sup>V327T</sup>      | pYX142- <i>mtRFPm</i> |
| JSY9473                                     | <i>alpha</i> | <i>ade2-1 leu2-3 his3-11,15 trp1-1 ura3-1 can1-100 fzo1::URA3 dnm1::HIS3</i> | pRS414- <i>fzo1</i> <sup>L819V</sup>      | pYX142- <i>mtRFPm</i> |
| <b>fzo1Δ HA-tag strains</b>                 |              |                                                                              |                                           |                       |
| JSY7656                                     | <i>alpha</i> | <i>ade2-1 leu2-3 his3-11,15 trp1-1 ura3-1 can1-100 fzo1::HIS3</i>            | pRS414-3xHA-FZO1                          | -                     |
| JSY9082                                     | <i>alpha</i> | <i>ade2-1 leu2-3 his3-11,15 trp1-1 ura3-1 can1-100 fzo1::HIS3</i>            | pRS414-3xHA- <i>fzo1</i> <sup>V196M</sup> | -                     |
| JSY9083                                     | <i>alpha</i> | <i>ade2-1 leu2-3 his3-11,15 trp1-1 ura3-1 can1-100 fzo1::HIS3</i>            | pRS414-3xHA- <i>fzo1</i> <sup>V327T</sup> | -                     |
| JSY9084                                     | <i>alpha</i> | <i>ade2-1 leu2-3 his3-11,15 trp1-1 ura3-1 can1-100 fzo1::HIS3</i>            | pRS414-3xHA- <i>fzo1</i> <sup>L819V</sup> | -                     |
| <b>FZO1 HA-tag strains</b>                  |              |                                                                              |                                           |                       |
| JSY9590                                     | <i>alpha</i> | <i>ade2-1 leu2-3 his3-11,15 trp1-1 ura3-1 can1-100 FZO1</i>                  | pRS414-3xHA-FZO1                          | -                     |
| JSY9591                                     | <i>alpha</i> | <i>ade2-1 leu2-3 his3-11,15 trp1-1 ura3-1 can1-100 FZO1</i>                  | pRS414-3xHA- <i>fzo1</i> <sup>V196M</sup> | -                     |
| JSY9592                                     | <i>alpha</i> | <i>ade2-1 leu2-3 his3-11,15 trp1-1 ura3-1 can1-100 FZO1</i>                  | pRS414-3xHA- <i>fzo1</i> <sup>V327T</sup> | -                     |
| JSY9593                                     | <i>alpha</i> | <i>ade2-1 leu2-3 his3-11,15 trp1-1 ura3-1 can1-100 FZO1</i>                  | pRS414-3xHA- <i>fzo1</i> <sup>L819V</sup> | -                     |
| <b>fzo1Δ Myc-tag strains</b>                |              |                                                                              |                                           |                       |
| JSY7655                                     | <i>alpha</i> | <i>ade2-1 leu2-3 his3-11,15 trp1-1 ura3-1 can1-100 fzo1::HIS3</i>            | pRS415-9xMyc-FZO1                         | -                     |

|         |              |                                                                   |                                            |   |
|---------|--------------|-------------------------------------------------------------------|--------------------------------------------|---|
| JSY9101 | <i>alpha</i> | <i>ade2-1 leu2-3 his3-11,15 trp1-1 ura3-1 can1-100 fzo1::HIS3</i> | pRS415-9xMyc- <i>fzo1</i> <sup>V196M</sup> | - |
| JSY9102 | <i>alpha</i> | <i>ade2-1 leu2-3 his3-11,15 trp1-1 ura3-1 can1-100 fzo1::HIS3</i> | pRS415-9xMyc- <i>fzo1</i> <sup>V327T</sup> | - |
| JSY9103 | <i>alpha</i> | <i>ade2-1 leu2-3 his3-11,15 trp1-1 ura3-1 can1-100 fzo1::HIS3</i> | pRS415-9xMyc- <i>fzo1</i> <sup>L819V</sup> | - |
| JSY9097 | <i>alpha</i> | <i>ade2-1 leu2-3 his3-11,15 trp1-1 ura3-1 can1-100 fzo1::HIS3</i> | pRS414-9xMyc- <i>fzo1</i> <sup>K200A</sup> | - |
| JSY9099 | <i>alpha</i> | <i>ade2-1 leu2-3 his3-11,15 trp1-1 ura3-1 can1-100 fzo1::HIS3</i> | pRS414-9xMyc- <i>fzo1</i> <sup>S201N</sup> | - |
| JSY9100 | <i>alpha</i> | <i>ade2-1 leu2-3 his3-11,15 trp1-1 ura3-1 can1-100 fzo1::HIS3</i> | pRS414-9xMyc- <i>fzo1</i> <sup>T221A</sup> | - |

---

#### HA and Myc-tag strains

---

|         |              |                                                                   |                                                                                         |   |
|---------|--------------|-------------------------------------------------------------------|-----------------------------------------------------------------------------------------|---|
| JSY9109 | <i>alpha</i> | <i>ade2-1 leu2-3 his3-11,15 trp1-1 ura3-1 can1-100 fzo1::HIS3</i> | pRS415-9xMyc-FZO1<br>pRS414-3xHA-FZO1                                                   | - |
| JSY9114 | <i>alpha</i> | <i>ade2-1 leu2-3 his3-11,15 trp1-1 ura3-1 can1-100 fzo1::HIS3</i> | pRS415-9xMyc- <i>fzo1</i> <sup>V196M</sup><br>pRS414-3xHA- <i>fzo1</i> <sup>V196M</sup> | - |
| JSY9115 | <i>alpha</i> | <i>ade2-1 leu2-3 his3-11,15 trp1-1 ura3-1 can1-100 fzo1::HIS3</i> | pRS415-9xMyc- <i>fzo1</i> <sup>V327T</sup><br>pRS414-3xHA- <i>fzo1</i> <sup>V327T</sup> | - |
| JSY9116 | <i>alpha</i> | <i>ade2-1 leu2-3 his3-11,15 trp1-1 ura3-1 can1-100 fzo1::HIS3</i> | pRS415-9xMyc- <i>fzo1</i> <sup>L819V</sup><br>pRS414-3xHA- <i>fzo1</i> <sup>L819V</sup> | - |
| JSY9127 | <i>alpha</i> | <i>ade2-1 leu2-3 his3-11,15 trp1-1 ura3-1 can1-100 fzo1::HIS3</i> | pRS415-9xMyc- <i>fzo1</i> <sup>V196M</sup><br>pRS414-3xHA-FZO1                          | - |
| JSY9123 | <i>alpha</i> | <i>ade2-1 leu2-3 his3-11,15 trp1-1 ura3-1 can1-100 fzo1::HIS3</i> | pRS415-9xMyc- <i>fzo1</i> <sup>V327T</sup><br>pRS414-3xHA-FZO1                          | - |
| JSY9128 | <i>alpha</i> | <i>ade2-1 leu2-3 his3-11,15 trp1-1 ura3-1 can1-100 fzo1::HIS3</i> | pRS415-9xMyc- <i>fzo1</i> <sup>L819V</sup>                                              | - |

---

|         |              |                                                                   |                                                                |   |
|---------|--------------|-------------------------------------------------------------------|----------------------------------------------------------------|---|
| JSY9128 | <i>alpha</i> | <i>ade2-1 leu2-3 his3-11,15 trp1-1 ura3-1 can1-100 fzo1::HIS3</i> | pRS415-9xMyc- <i>fzo1</i> <sup>L819V</sup><br>pRS414-3xHA-FZO1 | - |
|---------|--------------|-------------------------------------------------------------------|----------------------------------------------------------------|---|

---

***mdm30Δ HA-tag strain***

|         |          |                                                                    |                  |   |
|---------|----------|--------------------------------------------------------------------|------------------|---|
| JSY9597 | <i>a</i> | <i>ade2-1 leu2-3 his3-11,15 trp1-1 ura3-1 can1-100 mdm30::HIS3</i> | pRS414-3xHA-FZO1 | - |
|---------|----------|--------------------------------------------------------------------|------------------|---|

---

All strains with the *fzo1Δ* background were generated by plasmid shuffle technique (Sikorski, RS and Boeke, JD, 1991) using the parent strain JSY7575.  
All strains with the wild-type *FZO1* genomic background were generated by transformation of the parent strain JSY3835.  
Strains for the mating fusion assay were generated by transformation of the *MAT a* and *MAT alpha* parent strains, JSY7819 and JSY8076.

---



**Table S2.** Plasmids used in this study.

| <b>B #</b> | <b>Plasmid</b>                             | <b>Selection</b> |
|------------|--------------------------------------------|------------------|
| B1078      | pYX142- <i>mtGFP</i>                       | <i>LEU2</i>      |
| B408       | pRS415- <i>COX4-GFP</i>                    | <i>LEU2</i>      |
| B1641      | pYX142- <i>mtRFPm</i>                      | <i>LEU2</i>      |
| B486       | pRS416- <i>FZO1</i>                        | <i>TRP1</i>      |
| B541       | pRS414- <i>FZO1</i>                        | <i>TRP1</i>      |
| B59        | pRS414- <i>empty</i>                       | <i>TRP1</i>      |
| B2108      | pRS414- <i>fzo1</i> <sup>V196M</sup>       | <i>TRP1</i>      |
| B2107      | pRS414- <i>fzo1</i> <sup>V327T</sup>       | <i>TRP1</i>      |
| B2311      | pRS414- <i>fzo1</i> <sup>L819V</sup>       | <i>TRP1</i>      |
| B2420      | pRS415-9xMyc- <i>FZO1</i>                  | <i>LEU2</i>      |
| B2422      | pRS415-9xMyc- <i>fzo1</i> <sup>V196M</sup> | <i>LEU2</i>      |
| B2428      | pRS415-9xMyc- <i>fzo1</i> <sup>V327T</sup> | <i>LEU2</i>      |
| B2430      | pRS415-9xMyc- <i>fzo1</i> <sup>L819V</sup> | <i>LEU2</i>      |
| B588       | pRS414-3xHA- <i>FZO1</i>                   | <i>TRP1</i>      |
| B2310      | pRS414-3xHA- <i>fzo1</i> <sup>V196M</sup>  | <i>TRP1</i>      |
| B2320      | pRS414-3xHA- <i>fzo1</i> <sup>V327T</sup>  | <i>TRP1</i>      |
| B2345      | pRS414-3xHA- <i>fzo1</i> <sup>L819V</sup>  | <i>TRP1</i>      |
| B586       | pRS414-9xMyc- <i>FZO1</i>                  | <i>TRP1</i>      |
| B2346      | pRS414-9xMyc- <i>fzo1</i> <sup>K200A</sup> | <i>TRP1</i>      |
| B2343      | pRS414-9xMyc- <i>fzo1</i> <sup>S201N</sup> | <i>TRP1</i>      |
| B1022      | pRS414-9xMyc- <i>fzo1</i> <sup>T221A</sup> | <i>TRP1</i>      |

Point mutations were introduced into the *FZO1* coding sequence by site-directed mutagenesis and subcloned into vectors containing 3xHA and 9xMyc epitope tag sequences.
